# Supplementary material for: Realizing a novel dazzling far-red-emitting phosphor NaLaCaTeO6:Mn4+with high quantum yield and luminescence thermal stabilityviathe ionic couple substitution of Na++ La3+for 2Ca2+in Ca3TeO6:Mn4+for indoor plant cultivation LEDs
Source: Royal Society of Chemistry journal article supplement (doi:10.1039/c9cc05465k), 2019-01-01
Supplement: c9cc05465k1.pdf [file c9cc05465k1.pdf]

## Supporting Information

### **Realizing a novel dazzling far-red-emitting phosphor NaLaCaTeO<sub>6</sub>:Mn<sup>4+</sup> with high quantum yield and luminescence thermal stability via the ionic couple substitution of Na<sup>+</sup>+La<sup>3+</sup> for 2Ca<sup>2+</sup> in Ca<sub>3</sub>TeO<sub>6</sub>:Mn<sup>4+</sup> for indoor plant cultivation LEDs**

Kai Li\* and Rik Van Deun

L<sup>3</sup>-Luminescent Lanthanide Lab, Department of Chemistry, Ghent University, Krijgslaan 281-S3, B-9000 Ghent, Belgium

Corresponding author: Email: kailiac@126.com (Kai Li)

---

#### **Experimental information**

##### **Materials synthesis**

A series of materials with the chemical formula NaLaCaTe<sub>1-x</sub>O<sub>6</sub>:xMn<sup>4+</sup> (NLCTO:xMn<sup>4+</sup>, x = 0-0.04) and Na<sub>y</sub>La<sub>y</sub>Ca<sub>3-2y</sub>TeO<sub>6</sub>:0.01Mn<sup>4+</sup> (N<sub>y</sub>L<sub>y</sub>C<sub>3-2y</sub>TO:0.01Mn<sup>4+</sup>, y = 0-1.5) were synthesized using a high-temperature solid-state reaction method. Stuff Na<sub>2</sub>CO<sub>3</sub> (A.R.), La<sub>2</sub>O<sub>3</sub> (99.99%), TeO<sub>2</sub> (99.99%) and MnO<sub>2</sub> (A.R.) were weighted according to the given chemical formula and ground in an agate mortar with a pestle after the addition of necessary ethanol to obtain the homogeneous mixture. Then, the mixture was ground again for 1 min followed by dried an oven with 60 °C, and they were transferred into a ceramic crucible for pre-calcination in a furnace under air condition at 500 °C for 2 h and subsequent calcination at 1100 °C for 6 h, keeping a heating rate of 5 °C/min. Finally, the products were cooled within the furnace and ground for another 1 min for subsequent characterization.

##### **Characterization**

An X-ray diffraction (XRD) measurement was conducted on the setup of Thermo Scientific ARLX'TRA diffractometer equipped with a Cu K $\alpha$  source ( $\lambda = 1.5405 \text{ \AA}$ ), maintaining the scanning rate at 5°/min in the scattering angle range (2 $\theta$ ) of 15°-65°. Rietveld refinement for a powder X-ray diffraction (PXRD) pattern required the different scanning range of 5-90° with a processing rate of 0.5°/min. Energy Dispersive X-Ray Fluorescence (XRF) measurement was done on the Rigaku NEX CG setup. Photoluminescence (PL), quantum yield (QY) and lifetimes were recorded on an Edinburgh Instruments FLSP 920 UV-vis-NIR spectrofluorimeter, equipped with a 450 W continuous xenon lamp and a 60 W pulsed xenon lamp. Additionally, the

measurement of temperature-dependent PL spectrum was implemented with the assistance of a temperature controller Model 336 from Lakeshore Company.

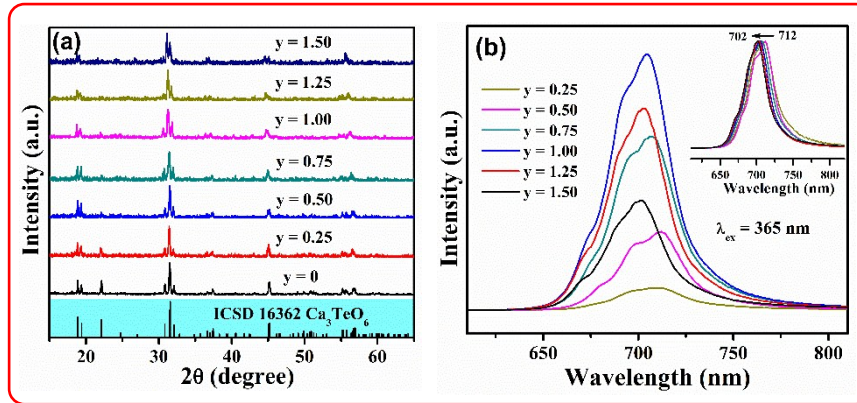

**Fig. S1** (a) XRD patterns for  $N_yL_yC_{3-2y}TO:0.01Mn^{4+}$  ( $y = 0-1.5$ ) with the different  $Na^+$  and  $La^{3+}$  substituted concentration. (b) PL emission spectra ( $\lambda_{ex} = 365$  nm) for  $N_yL_yC_{3-2y}TO:0.01Mn^{4+}$  ( $y = 0.25-1.5$ ), inset is the corresponding normalized PL emission spectra.

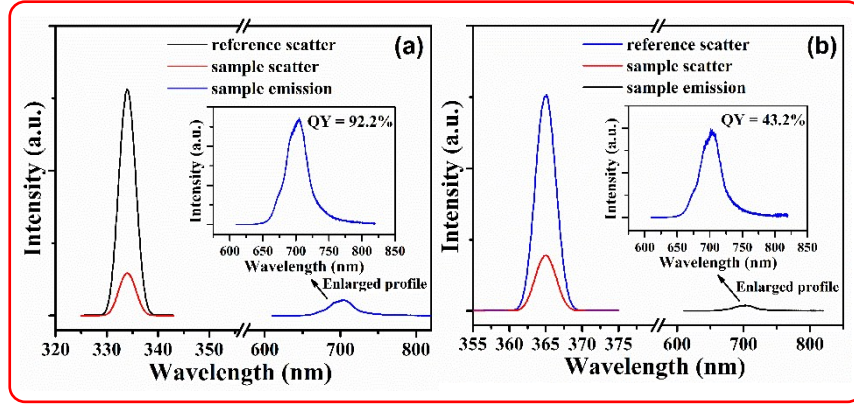

**Fig. S2** The reference, sample absorption and sample emission for calculating quantum yield (QY) for NLCTO:0.01Mn<sup>4+</sup> samples under 334 (a) and 365 nm (b) excitations.

The quantum yield can be obtained using the integrated sphere method as follows:<sup>1</sup>

$$\eta = \frac{\int L_{emission}}{\int E_{blank} - \int E_{sample}} \quad (S1)$$

where  $L_{emission}$  is the integrated value of the emission spectrum,  $E_{blank}$  and  $E_{sample}$  are the integrated values of the “excitation” band of the blank and the excitation band of the sample (since the sample absorbs part of the light, this value will be smaller than  $E_{blank}$ ), respectively.

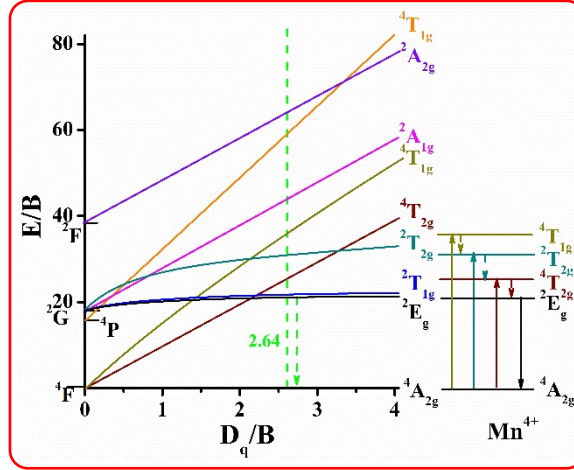

**Fig. S3** Simplified Tanabe-Sugano energy level diagram of the  $\text{Mn}^{4+}$  ( $d^3$ ) electron configuration in the octahedral crystal field of the NLCTO host.

The local crystal-field strength ( $D_q$ ) around the  $\text{Mn}^{4+}$  ions by the next equation:<sup>2</sup>

$$D_q = E(4T_{2g} \leftarrow 4A_{2g})/10 \quad (\text{S2})$$

According to the PL emission and excitation spectra, the peak energy of the  $4T_{2g} \leftarrow 4A_{2g}$  transition is  $21008 \text{ cm}^{-1}$  (476 nm), therefore, the  $D_q$  is estimated to be  $2101 \text{ cm}^{-1}$ . By using the energy difference between the  $4T_{2g} \leftarrow 4A_{2g}$  ( $21008 \text{ cm}^{-1}$ ) and  $4T_{1g} \leftarrow 4A_{2g}$  ( $29070 \text{ cm}^{-1}$ ) transitions (which turns out to be  $8062 \text{ cm}^{-1}$ ), the Racah parameter  $B$  can be calculated according to the equation:<sup>3</sup>

$$\frac{D_q}{B} = \frac{15(x-8)}{x^2-10x} \quad (\text{S3})$$

where  $x$  is:

$$x = \frac{E(4T_{1g} \leftarrow 4A_{2g}) - E(4T_{2g} \leftarrow 4A_{2g})}{D_q} \quad (\text{S4})$$

Therefore, the parameter  $B$  can be estimated to be  $796 \text{ cm}^{-1}$ . After that, the second Racah parameter  $C$  can be estimated from the following equation:

$$\frac{E(2E_g \rightarrow 4A_{2g})}{B} = \frac{3.05C}{B} - \frac{1.8B}{D_q} + 7.9 \quad (\text{S5})$$

According to the emission spectrum, the peak energy of  $2E_g \rightarrow 4A_{2g}$  transition is about  $14164 \text{ cm}^{-1}$ , after combining the parameter  $B$  and  $D_q$  above, consequently, the parameter  $C$  is  $2760 \text{ cm}^{-1}$ .

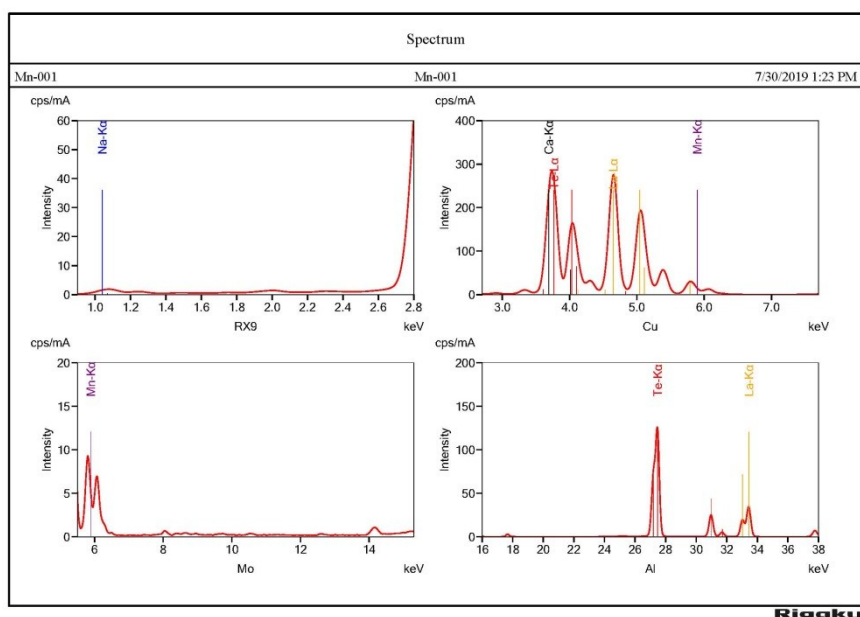

**Fig. S4** XRF spectra for the representative NLCTO:0.01Mn<sup>4+</sup> sample.

Result of elemental analysis:

| No. | Component | Result | Unit  | Statistical error | Detection limit | Quantitation limit |
|-----|-----------|--------|-------|-------------------|-----------------|--------------------|
| 1   | O         | 0.00   | mass% |                   |                 |                    |
| 2   | Na        | 7.04   | mass% | 0.264             | 0.560           | 1.68               |
| 3   | La        | 41.82  | mass% | 0.177             | 0.0499          | 0.150              |
| 4   | Ca        | 12.16  | mass% | 0.0398            | 0.0884          | 0.265              |
| 5   | Te        | 38.8   | mass% | 0.142             | 0.0360          | 0.108              |
| 6   | Mn        | 0.17   | mass% | 0.0134            | 0.0069          | 0.0208             |

Calculated elemental molar ratio

$$\text{Na:La:Ca:Te:Mn} = 0.306:0.303:0.304:0.305:0.00309$$

Since O is a light element, it can not be detected by the XRF measurement in current case and it can be ignorable for calculation.

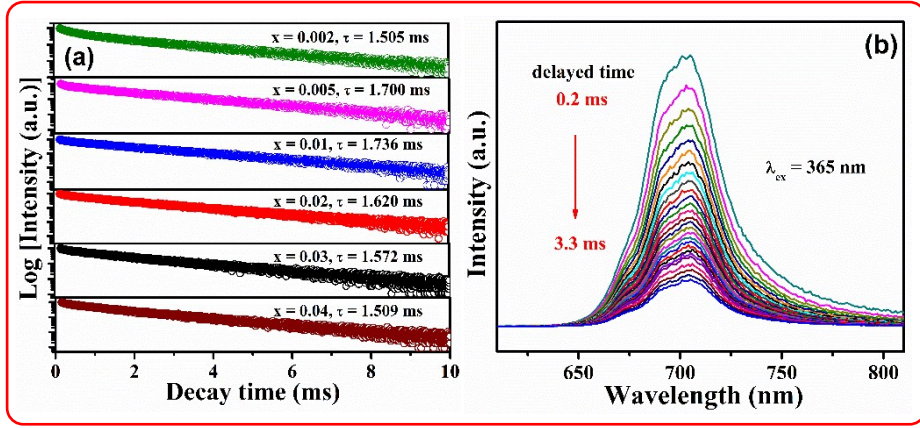

**Fig. S5** (a) Decay curves ( $\lambda_{\text{ex}} = 365 \text{ nm}$ ,  $\lambda_{\text{em}} = 706 \text{ nm}$ ) and calculated decay times of series NLCTO: $x\text{Mn}^{4+}$  samples as a function of  $x$ . (b) Time-resolved emission spectra ( $\lambda_{\text{ex}} = 365 \text{ nm}$ ) for NLCTO:0.01 $\text{Mn}^{4+}$  with the delayed time from 0.2 ms to 3.3 ms.

The double-exponential function is used for decay curves fitting, which can be expressed as follows:<sup>4</sup>

$$I(t) = I_0 + A_1 \exp(-t/\tau_1) + A_2 \exp(-t/\tau_2)$$

(6) Where  $I(t)$  and  $I_0$  are the intensity at the time of  $t$  and 0, respectively,  $A_1$  and  $A_2$  are the constants,  $\tau_1$  and  $\tau_2$  stand for the fluorescence lifetimes for the fast and slow decay, respectively.

The average lifetimes ( $\tau$ ) can be estimated by the following formula:

$$\tau = (A_1\tau_1^2 + A_2\tau_2^2) / (A_1\tau_1 + A_2\tau_2) \quad (7)$$

**Table S1** Detailed crystallographic data of refinement parameters for the NLCTO and NLCTO:0.01Mn<sup>4+</sup> samples.

| Sample                         | NLCTO          | NLCTO:0.01Mn <sup>4+</sup> |
|--------------------------------|----------------|----------------------------|
| Space group                    | <i>P121/c1</i> | <i>P121/c1</i>             |
| Symmetry                       | monoclinic     | monoclinic                 |
| a, Å                           | 5.6200(4)      | 5.6307(3)                  |
| b, Å                           | 5.8302(4)      | 5.8355(3)                  |
| c, Å                           | 8.0511(4)      | 8.0699(4)                  |
| V, Å <sup>3</sup>              | 263.80(3)      | 265.16(2)                  |
| Z                              | 2              | 2                          |
| $\alpha = \gamma, ^\circ$      | 90             | 90                         |
| $\beta$                        | 90.188         | 90.342                     |
| 2 $\theta$ -interval, $^\circ$ | 5-90           | 5-90                       |
| R <sub>wp</sub> /%             | 13.72%         | 13.60                      |
| R <sub>p</sub> /%              | 11.20%         | 10.80                      |
| $\chi^2$                       | 1.116          | 1.203                      |

1 R. Van Deun, D. Ndagsi, J. Liu, I. Van Driessche, K. Van Hecke and A. M. Kaczmarek, *Dalton Trans.*, 2015, **44**, 15022-15030.

2 M.G. Brik and A.M. Srivastava, *ECS J. Solid State Sci. Technol.*, 2013, **2**, R148-R152.

3 M.G. Brik, S.J. Camardello and A.M. Srivastava, Influence of Covalency on the Mn<sup>4+</sup> <sup>2</sup>E<sub>g</sub> → <sup>4</sup>A<sub>2g</sub> Emission Energy in Crystals, *ECS J. Solid State Sci. Technol.*, 2015, **4**, R39-R43.

4 M. P. Saradhi and U. V. Varadaraju, *Chem. Mater.*, 2006, **18**, 5267-5272.
